# Supplementary material for: Naphtha catalytic cracking to olefins over zirconia–titania catalyst
Source: Royal Society of Chemistry journal article supplement (doi:10.1039/d1re00290b), 2021-09-27
Supplement: d1re00290b1.pdf [file d1re00290b1.pdf]

# Supporting Information

## Naphtha catalytic cracking to olefins over zirconia-titania catalyst

Emad N. Shafei <sup>\*(1)</sup>, Mohammed Z. Albahar <sup>(1)</sup>, Mohammad F. Aljishi <sup>(1)</sup>, Ali N. Aljishi <sup>(1)</sup>, Ali S.

Alnasir<sup>(1)</sup>, Hameed H. Al-Badairy <sup>(1)</sup> and Mohammed A Sanhoob <sup>(2)</sup>

<sup>(1)</sup> Research and Development Center, Saudi Aramco, Dhahran 31311, Saudi Arabia.

<sup>(2)</sup> Interdisciplinary Research Center for Hydrogen and Energy Storage (IRC-HES), King Fahd University of Petroleum and Minerals, Dhahran 31261, Saudi Arabia

\*Corresponding author: shafeien@aramco.com, emadnaji@gmail.com

### Contents

|            |                                                                                                                                                                                                                                                            |
|------------|------------------------------------------------------------------------------------------------------------------------------------------------------------------------------------------------------------------------------------------------------------|
| Table 1S.  | The textural properties of synthesized Zr-Ti oxide catalyst after reaction                                                                                                                                                                                 |
| Table 2S.  | The Lewis and Brønsted acid sites concentrations from the adsorption of pyridine-FTIR of Zr-Ti oxide catalyst                                                                                                                                              |
| Figure 1S. | FTIR-pyridine spectrum of Zr-Ti oxide catalyst                                                                                                                                                                                                             |
| Figure 2S. | Conversion and selectivity of light olefin and other products from dodecane conversion using Zr-Ti oxide catalysts compared with thermal cracking vs. reactor temperature (without steam), LHSV 0.5 h <sup>-1</sup>                                        |
| Figure 3S. | Steam vs. no steam catalytic cracking of dodecane conversion and selectivity of light olefin and other product using Zr-Ti oxide catalysts compared with thermal cracking vs. reactor temperature (cracking temperature 625 °C, LHSV 0.5 h <sup>-1</sup> ) |
| Figure 4S. | Steam vs. no steam of time-on-stream catalytic cracking: yield of olefin, ethylene, propylene and butenes of 50% Zr-Ti oxide (catalytic cracking temperature 625 °C, LHSV 0.5 h <sup>-1</sup> )                                                            |
| Figure 5S. | Steam vs. no steam of time-on-stream catalytic cracking: yield of olefin, ethylene, propylene and butenes of 10% Zr-Ti oxide (catalytic cracking temperature 625 °C, LHSV 0.5 h <sup>-1</sup> )                                                            |
| Figure 6S. | Schematic diagram of dodecane cracking via Zr-Ti oxide catalyst                                                                                                                                                                                            |

### 3. Results and Discussion

Table 1S. The textural properties of synthesized Zr-Ti oxide catalyst after reaction

| Catalyst                       | Surface area,<br>m <sup>2</sup> g <sup>-1</sup> | Pore volume<br>cm <sup>3</sup> g <sup>-1</sup> |
|--------------------------------|-------------------------------------------------|------------------------------------------------|
| 10% Zr-Ti oxide                | 15.7                                            | 0.15                                           |
| 10% Zr-Ti oxide after reaction | 12.9                                            | 0.05                                           |
| 50% Zr-Ti oxide                | 48.7                                            | 0.33                                           |
| 50% Zr-Ti oxide after reaction | 26.0                                            | 0.24                                           |

Table 2S. The Lewis and Brønsted acid sites concentrations from the adsorption of pyridine-FTIR of Zr-Ti oxide catalyst

| Catalyst         | Temperature<br>(°C) | *C <sub>L</sub><br>(mmolg <sup>-1</sup> ) | **C <sub>B</sub><br>(mmolg <sup>-1</sup> ) | Total acidity<br>(mmolg <sup>-1</sup> ) | L/B** |
|------------------|---------------------|-------------------------------------------|--------------------------------------------|-----------------------------------------|-------|
| TiO <sub>2</sub> | 150                 | 0.019                                     | 0.004                                      | 0.023                                   | 4.9   |
| 10% Zr-Ti oxide  | 150                 | 0.060                                     | 0.009                                      | 0.069                                   | 6.8   |
| 50% Zr-Ti oxide  | 150                 | 0.137                                     | 0.019                                      | 0.156                                   | 7.2   |

\*C<sub>L</sub>: concentration of Lewis acid sites, \*\*C<sub>B</sub>: concentration of Brønsted acid sites, \*\*\*L/B: Lewis/ Brønsted acid ratio

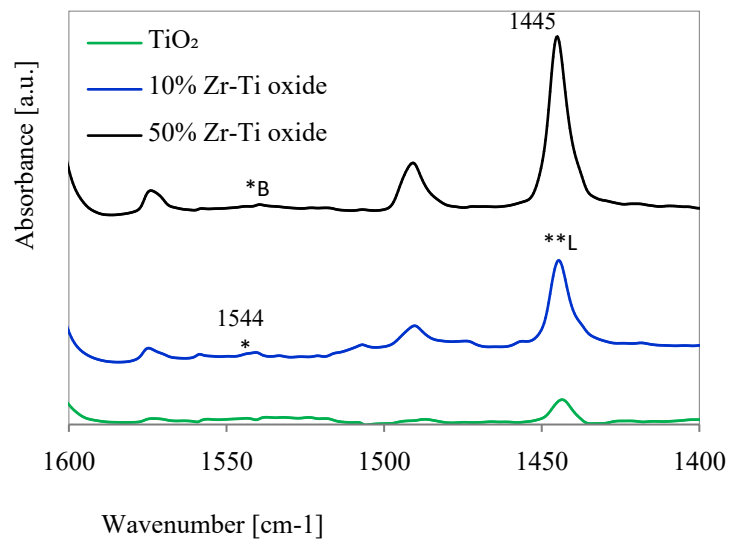

Figure 1S. FTIR-pyridine spectrum of Zr-Ti oxide catalyst (\*Brønsted acid sites \*\*Lewis acid sites)

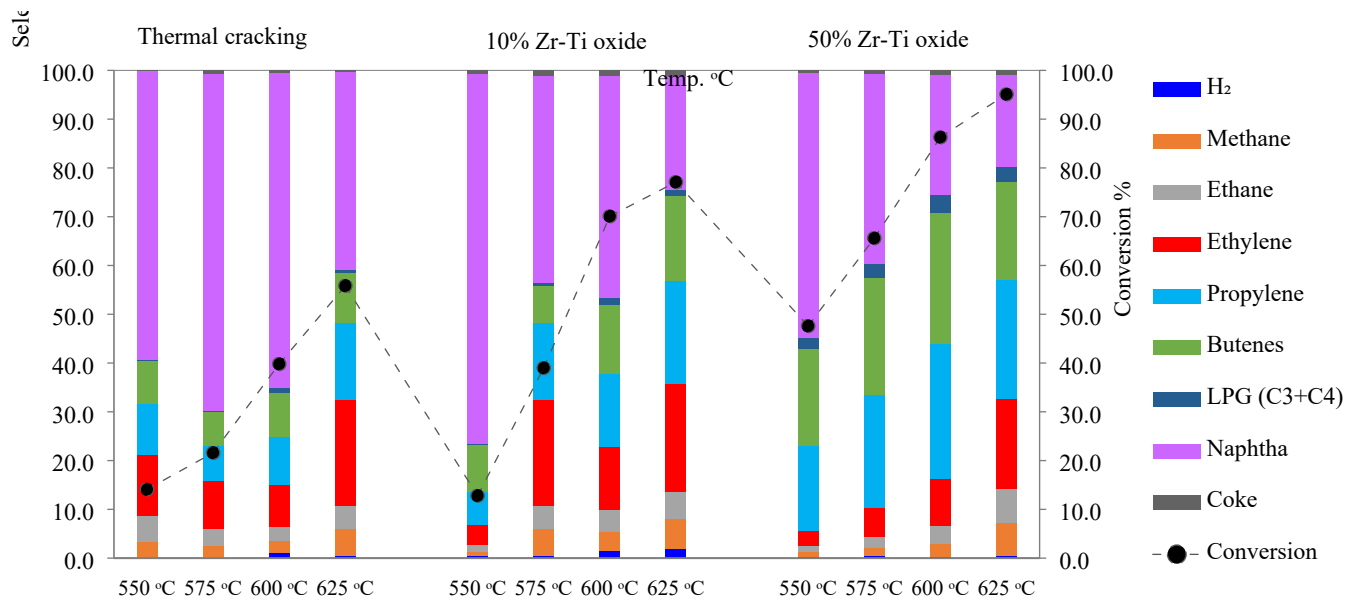

Figure 2S. Conversion and selectivity of light olefin and other products from dodecane conversion using Zr-Ti oxide catalysts compared with thermal cracking vs. reactor temperature (without steam), LHSV 0.5 h<sup>-1</sup>

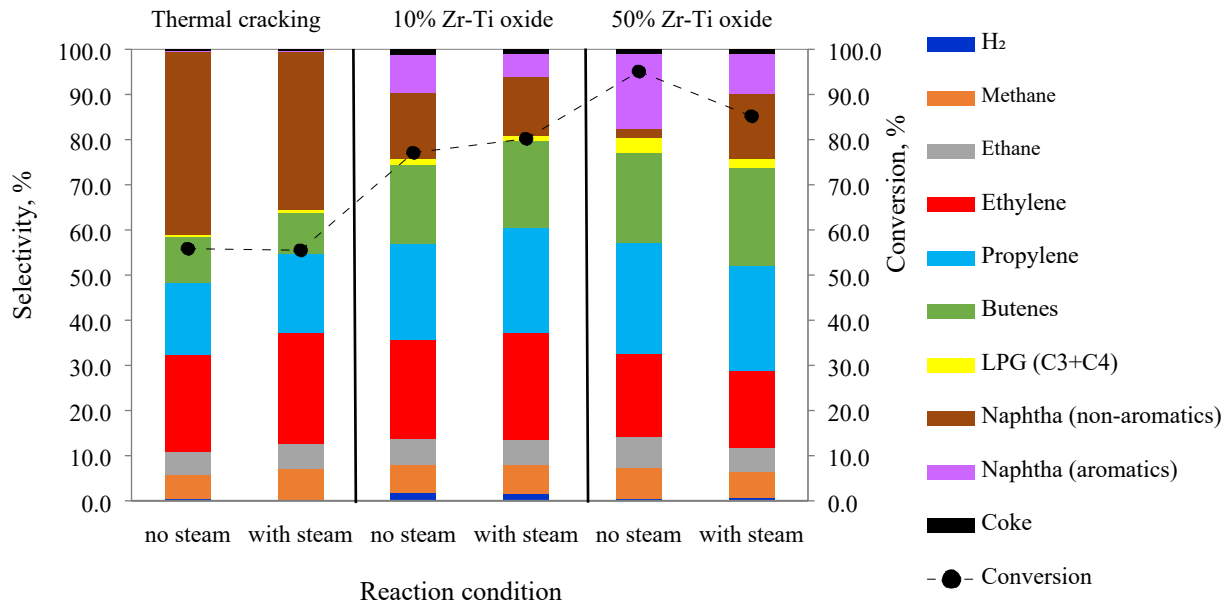

Figure 3S. Steam vs. no steam catalytic cracking of dodecane conversion and selectivity of light olefin and other product using Zr-Ti oxide catalysts compared with thermal cracking vs. reactor temperature (cracking temperature 625 °C, LHSV 0.5 h<sup>-1</sup>)

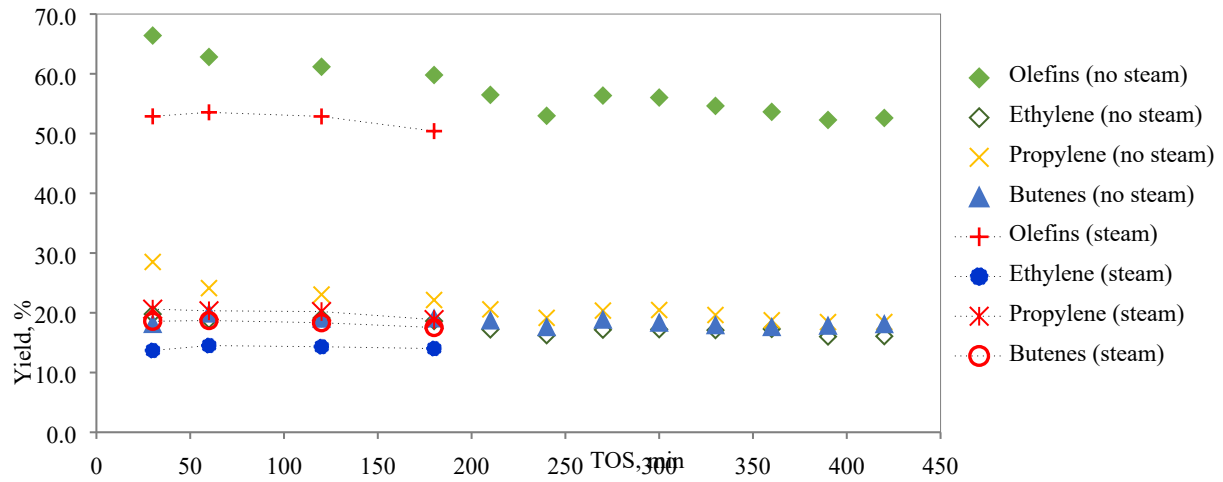

Figure 4S. Steam vs. no steam of time-on-stream catalytic cracking: yield of olefin, ethylene, propylene and butenes of 50% Zr-Ti oxide (catalytic cracking temperature 625 °C, LHSV 0.5 h<sup>-1</sup>)

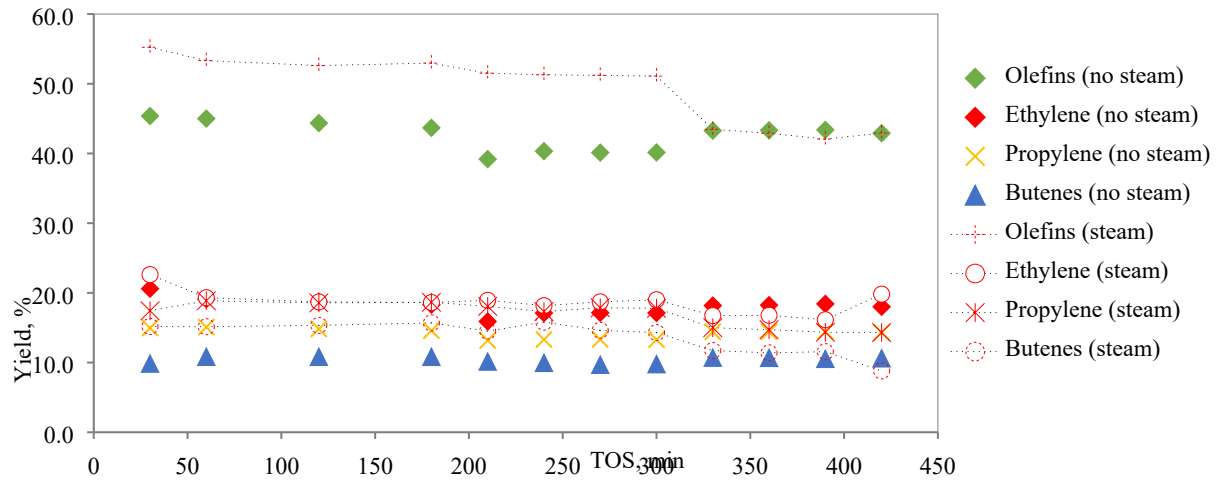

Figure 5S. Steam vs. no steam of time-on-stream catalytic cracking: yield of olefin, ethylene, propylene and butenes of 10% Zr-Ti oxide (catalytic cracking temperature 625 °C, LHSV 0.5 h<sup>-1</sup>)

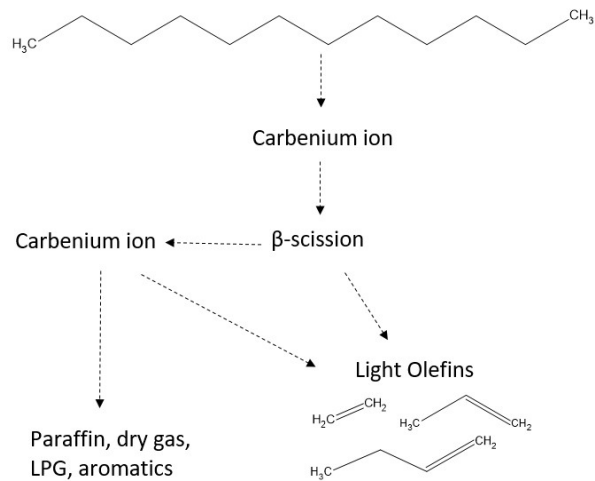

Figure 6S. Schematic diagram of dodecane cracking via Zr-Ti oxide catalyst
